# Supplementary material for: A Small Protein Associated with Fungal Energy Metabolism Affects the Virulence of Cryptococcus neoformans in Mammals
Source: PubMed Central journal article supplement (PMC5008624; doi:10.1371/journal.ppat.1005849), 2016-09-01
Supplement: ppat.1005849.s007.pdf [file ppat.1005849.s007.pdf]

S1 Table. List of experiments conducted that showed no difference between the *hva1Δ* and *hva1Δ+HVA1* strains.

| Experiment                                                                                              |
|---------------------------------------------------------------------------------------------------------|
| Capsule size in DMEM+5% CO <sub>2</sub>                                                                 |
| Melanin production on L-Dopa plates                                                                     |
| GXM release measured by sandwich ELISA                                                                  |
| Phospholipase production on Malt Egg Yolk Agar plates                                                   |
| Urease production in Roberts urea broth at 2 or 4 hours by optical density                              |
| Doubling time at 37 °C in YPD                                                                           |
| Growth in conditions of oxidative stress: 2 mM H <sub>2</sub> O <sub>2</sub> plates                     |
| Growth in conditions of nitrosative stress: 1mM NaNO <sub>2</sub> + 25 mM succinic acid plates          |
| Growth in conditions of low iron: 100 μM of the iron chelator BPS                                       |
| Growth in conditions of cell wall stress: 1M KCl, 1M NaCl, 0.03% SDS or 400 mM CaCl <sub>2</sub> plates |
| Growth in conditions of osmotic stress: 1M Sorbitol plates                                              |
| Differences in molecular capsule structure and size by light scattering                                 |
| Phagocytic efficacy of J774.16 mouse macrophages                                                        |
| Fungal burden in J774.16 mouse macrophages                                                              |
| Survival in <i>C. elegans</i>                                                                           |
| Survival in <i>G. mellonella</i>                                                                        |
| Survival in Balb/c mice infected intra-tracheally                                                       |
