# Supplementary material for: A Small Protein Associated with Fungal Energy Metabolism Affects the Virulence of Cryptococcus neoformans in Mammals
Source: PubMed Central journal article supplement (PMC5008624; doi:10.1371/journal.ppat.1005849), 2016-09-01
Supplement: ppat.1005849.s008.pdf [file ppat.1005849.s008.pdf]

S2 Table. Crystallographic data and refinement statistics

| <b>PDB ID</b>                                                                      | <b>4P5N</b>                                  |
|------------------------------------------------------------------------------------|----------------------------------------------|
| Source                                                                             | NSLS X29A                                    |
| Wavelength (Å)                                                                     | 0.9790                                       |
| Resolution limits (Å)                                                              | 35.51-1.49                                   |
| Space group                                                                        | P 1                                          |
| Unit cell <i>a</i> , <i>b</i> , <i>c</i> (Å) and $\alpha$ , $\beta$ , $\gamma$ (°) | 31.77, 34.69, 38.25 and 73.93<br>72.85 79.46 |
| Number of observations                                                             | 64741                                        |
| Number of unique reflections                                                       | 23265                                        |
| Completeness (%)                                                                   | 95.7(91.6)                                   |
| Mean $I/\sigma^c$                                                                  | 34.4(9.9)                                    |
| $R_{merge}$ on $I^a$                                                               | 0.048(0.15)                                  |
| Cut-off criteria $I/\sigma$                                                        | None                                         |
| Redundancy                                                                         | 2.8(2.7)                                     |
|                                                                                    |                                              |
| <b>Refinement Program</b>                                                          | REFMAC 5.7.0032                              |
| Resolution limits (Å)                                                              | 35.51 -1.49                                  |
| Number of reflections<br>(work/test)                                               | 22074/1191                                   |
| $R_{work}^b$                                                                       | 0.135                                        |
| $R_{free}$                                                                         | 0.177                                        |
| <i>F<sub>o</sub></i> , <i>F<sub>c</sub></i> correlation                            | 0.97                                         |
| Protein/H <sub>2</sub> O                                                           | 1636/38                                      |
| Mean B values (Å <sup>2</sup> )                                                    | 15.8                                         |
| Bonds (Å) / angles (°)                                                             | 0.012/1.45                                   |
| Ramachandran plot<br>(favored/allowed)                                             | 97.0/3.0                                     |

$$^a R_{merge} = \frac{\sum_{hkl} \sum_i |I_i(hkl) - \langle I(hkl) \rangle|}{\sum_{hkl} \sum_i I_i(hkl)}$$

$$^b R_{work} = \frac{\sum |F_o - F_c|}{\sum F_o}$$

where  $F_o$  and  $F_c$  are observed and calculated structure factors, respectively.

<sup>c</sup>Values in parentheses correspond to the high resolution bin (1.53 Å – 1.49 Å).
